# Supplementary material for: A new class of tethered-arene ruthenium(ii) complexes with pendant P and C donor atoms: synthesis of η6:η1:η1phosphonio-azabutadienyl ruthenabicycles via allenylidene intermediates
Source: Royal Society of Chemistry journal article supplement (doi:10.1039/b404971c), 2004-01-01
Supplement: b404971c.doc [file b404971c.doc]

**ELECTRONIC SUPPLEMENTARY INFORMATION**

**A new class of tethered-arene ruthenium(II) complexes with pendant P and C donor atoms: Synthesis of *η*6:*η*1:*η*1 phosphonio-azabutadienyl ruthenabicycles *via* allenylidene intermediates**

Victorio Cadierno,* Josefina Díez, Joaquín García-Álvarez and José Gimeno*

*Departamento de Química Orgánica e Inorgánica, I.U.Q.O.E.M., Facultad de Química, Universidad de Oviedo, 33071, Oviedo, Spain*

**Experimental Section**

**General methods.** The manipulations were performed under an atmosphere of dry nitrogen using vacuum-line and standard Schlenk techniques. Solvents were dried by standard methods and distilled under nitrogen before use. All reagents were obtained from commercial suppliers and used without further purification with the exception of compounds [RuCl(*η*6-arene){*κ*2-*P,N*-Ph2PCH2P(=N-4-C5F4N)Ph2}][SbF6] (arene = *p*-cymene **1a**, 1,3,5-C6H3Me3 **3**, C6Me6 **4**),1 [RuCl2(*η*6-*p*-cymene){*κ*1-*P*-Ph2PCH2P(=N-4-C6F4CN)Ph2}],2 Ph2PCH2P{=N-3,4-C6F3(CN)2}Ph2,3 and 4-azido-2,3,5,6-tetrafluoro-benzaldehyde4 which were prepared by following the methods reported in the literature. Infrared spectra were recorded on a Perkin-Elmer 1720-XFT spectrometer. The C, H and N analyses were carried out with a Perkin-Elmer 2400 microanalyzer. The conductivities were measured at room temperature, in *ca.* 10-3 mol dm-3 acetone solutions, with a Jenway PCM3 conductimeter. NMR spectra were recorded on a Bruker DPX300 instrument at 300 MHz (1H), 121.5 MHz (31P), 282.4 MHz (19F) or 75.4 MHz (13C) using SiMe4, CFCl3 or 85% H3PO4 as standards. DEPT experiments have been carried out for all the compounds reported in this paper.

**Synthesis of Ph2PCH2P(=N-4-C6F4CHO)Ph2.** 4-Azido-2,3,5,6-tetrafluoro-benzaldehyde (3.286 g, 15 mmol) was added at -78ºC to a solution of bis(diphenylphosphino)methane (5.766 g, 15 mmol) in THF (100 cm3). The reaction mixture was slowly warmed to room temperature and then evaporated to dryness to give a brown oil, which when dissolved in acetonitrile and cooled to 0ºC gave a microscrystalline yellow solid.Yield: 7.596 g, 88% (Found: C, 66.68; H, 4.12; N, 2.39. C32H23F4P2NO requires C, 66.79; H, 4.03; N, 2.43%). **/cm-1 468m, 510m, 525m, 560w, 626m, 693s, 717m, 736s, 778m, 881s, 972s, 998w, 1027w, 1112m, 1217s, 1309m, 1396s, 1436m, 1488s, 1509s, 1640s, 1690s, 2793w, 2864w, 3058w (KBr). **P(CDCl3) -29.80 (d, 2*J*(PP) = 53.7, Ph2P), 13.88 (dt, 2*J*(PP) = 53.7, 4*J*(PF) = 6.1, Ph2P=N); **F(CDCl3) -155.88 and -151.03 (m, 2 F each, C6F4); **H(CDCl3) 3.48 (d, 2 H, 2*J*(HP) = 12.1, PCH2P), 7.18-7.52 (m, 14 H, Ph), 7.79-7.91 (m, 6 H, Ph), 10.01 (s, 1 H, CHO); **C(CDCl3) 30.89 (dd, 1*J*(CP) = 57.6 and 32.8, PCH2P), 102.90 (t, 2*J*(CF) = 9.6, *C*CHO), 128.30-149.60 (m, Ph and C6F4), 182.40 (s, CHO).

**Synthesis of [RuCl2(*η*6-*p*-cymene){*κ*1-*P*-Ph2PCH2P(=N-4-C6F4CHO)Ph2}].** A solution of [{Ru(*η*6-*p*-cymene)(*µ*-Cl)Cl}2] (0.245 g, 0.4 mmol) and Ph2PCH2P(=N-4-C6F4CHO)Ph2 (0.490 g, 0.85 mmol) in dichloromethane (30 cm3) was stirred at room temperature for 1 h. The solution was then concentrated (*ca.* 2 cm3) and diethyl ether (50 cm3) was added yielding an orange solid which was washed with diethyl ether (3 x 5 cm3) and vacuum-dried. Yield: 0.585 g, 83% (Found: C, 57.09; H, 4.15; N, 1.64. RuC42H37F4Cl2P2NO requires C, 57.22; H, 4.23; N, 1.59%). **/cm-1 488m, 498m, 540w, 627w, 692s, 739m, 764w, 799w, 878m, 973s, 1037w, 1109m, 1224s, 1309w, 1398s, 1438m, 1487s, 1516s, 1639s, 1691s, 2872w, 2963w, 3054w (KBr). **P(CD2Cl2) 8.63 (dt, 2*J*(PP) = 37.3, 4*J*(PF) = 6.7, Ph2P=N), 21.65 (d, 2*J*(PP) = 37.3, Ph2P); **F(CD2Cl2) -155.18 and -151.08 (m, 2 F each, C6F4); **H(CD2Cl2) 0.81 (d, 6 H, 3*J*(HH) = 6.8, CH(C*H*3)2), 1.66 (s, 3 H, CH3), 2.31 (sept, 1 H, 3*J*(HH) = 6.8, C*H*(CH3)2), 4.30 (dd, 2 H, 2*J*(HP) = 10.5 and 10.2, PCH2P), 5.08 and 5.11 (br, 2 H each, CH of *p*-cymene), 7.15-7.46 (m, 16 H, Ph), 7.86-7.91 (m, 4 H, Ph), 9.93 (s, 1 H, CHO); **C(CD2Cl2) 17.38 (s, CH3), 21.56 (s, CH(*C*H3)2), 22.09 (dd, 1*J*(CP) = 57.6 and 19.2, PCH2P), 30.41 (s, *C*H(CH3)2), 86.11 (d, 2*J*(CP) = 5.6, CH of *p*-cymene), 90.26 (d, 2*J*(CP) = 4.5, CH of *p*-cymene), 95.43 and 108.70 (s, C of *p*-cymene), 103.11 (t, 2*J*(CF) = 10.2, *C*CHO), 127.98-150.02 (m, Ph and C6F4), 182.30 (s, CHO).

**Synthesis of [RuCl2(*η*6-*p*-cymene)(*κ*1-*P*-Ph2PCH2P{=N-3,4-C6F3(CN)2}Ph2)].** A solution of [{Ru(*η*6-*p*-cymene)(*µ*-Cl)Cl}2] (0.245 g, 0.4 mmol) and Ph2PCH2P{=N-3,4-C6F3(CN)2}Ph2 (0.492 g, 0.85 mmol) in dichloromethane (30 cm3) was stirred at room temperature for 1 h. The solution was then concentrated (*ca.* 2 cm3) and diethyl ether (50 cm3) was added yielding an orange solid which was washed with diethyl ether (3 x 5 cm3) and vacuum-dried. Yield: 0.602 g, 85% (Found: C, 58.24; H, 4.05; N, 4.88. RuC43H36F3N3Cl2P2 requires C, 58.31; H, 4.10; N, 4.74%). **/cm-1 488m, 502m, 541w, 654w, 694s, 735s, 764w, 795w, 855w, 945w, 1013w, 1108m, 1161w, 1208s, 1296w, 1413s, 1438s, 1477s, 1519s, 1601m, 2229m, 2887w, 2961w, 3054w (KBr). **P(CD2Cl2) 9.91 (ddd, 2*J*(PP) = 37.8, 4*J*(PF) = 9.8 and 4.9, Ph2P=N), 21.54 (d, 2*J*(PP) = 37.8, Ph2P); **F(CD2Cl2) -138.34 (ddd, 1 F, 4*J*(FF) = 22.4, 3*J*(FF) = 21.0, 4*J*(FP) = 9.8, F atom in *ortho* position adjacent to F), -133.80 (dd, 1 F, 3*J*(FF) = 21.0, 5*J*(FF) = 2.1, F atom in *meta* position), -117.45 (ddd, 1 F, 4*J*(FF) = 22.4, 4*J*(FP) = 4.9, 5*J*(FF) = 2.1, F atom in *ortho* position adjacent to CN); **H(CD2Cl2) 0.81 (d, 6 H, 3*J*(HH) = 6.8, CH(C*H*3)2), 1.65 (s, 3 H, CH3), 2.29 (sept, 1 H, 3*J*(HH) = 6.8, C*H*(CH3)2), 4.30 (dd, 2 H, 2*J*(HP) = 10.5 and 10.2, PCH2P), 5.06 and 5.11 (d, 2 H each, 3*J*(HH) = 5.9, CH of *p*-cymene), 7.14-7.44 (m, 16 H, Ph), 7.84-7.90 (m, 4 H, Ph); **C(CD2Cl2) 17.42 (s, CH3), 21.56 (s, CH(*C*H3)2), 22.04 (dd, 1*J*(CP) = 55.9 and 18.1, PCH2P), 30.45 (s, *C*H(CH3)2), 86.13 (d, 2*J*(CP) = 5.8, CH of *p*-cymene), 86.98 (d, 3*J*(CF) = 18.6, CN), 90.22 (d, 2*J*(CP) = 4.1, CH of *p*-cymene), 95.61 and 108.92 (s, C of *p*-cymene), 98.37 (d, 3*J*(CF) = 9.8, CN), 111.44 and 111.86 (br, *C*CN), 128.11-157.51 (m, Ph and C6F3).

**Synthesis of [RuCl(*η*6-*p*-cymene){*κ*2-*P,N*-Ph2PCH2P(=N-4-C6F4CN)Ph2}][SbF6] 1b.** A suspension of complex [RuCl2(*η*6-*p*-cymene){*κ*1-*P*-Ph2PCH2P(=N-4-C6F4CN)Ph2}] (0.439 g, 0.5 mmol) and AgSbF6 (0.172 g, 0.5 mmol) in dichloromethane (40 cm3) was stirred in the dark, at room temperature, for 3 h. The reaction mixture was then filtered through Kieselguhr and the filtrate concentrated to dryness. The resulting orange solid was washed with diethyl ether (3 x 20 cm3) and dried in vacuo. Yield: 0.431 g, 80% (Found: C, 46.81; H, 3.22; N, 2.71. RuC42H36F10N2P2ClSb requires C, 46.75; H, 3.36; N, 2.60%). NMR data in accord with those reported for [RuCl(*η*6-*p*-cymene){*κ*2-*P,N*-Ph2PCH2P(=N-4-C6F4CN)Ph2}][PF6].2

**Synthesis of [RuCl(*η*6-*p*-cymene){*κ*2-*P,N*-Ph2PCH2P(=N-4-C6F4CHO)Ph2}][SbF6] 1c.** A suspension of complex [RuCl2(*η*6-*p*-cymene){*κ*1-*P*-Ph2PCH2P(=N-4-C6F4CHO)Ph2}] (0.441 g, 0.5 mmol) and AgSbF6 (0.172 g, 0.5 mmol) in dichloromethane (40 cm3) was stirred in the dark, at room temperature, for 3 h. The reaction mixture was then filtered through Kieselguhr and the filtrate concentrated to dryness. The resulting orange solid was washed with diethyl ether (3 x 20 cm3) and dried in vacuo. Yield: 0.444 g, 82% (Found: C, 46.71; H, 3.38; N, 1.33. RuC42H37F10P2ClNOSb requires C, 46.62; H, 3.45; N, 1.29%). Conductivity (acetone, 20°C) 118 W-1 cm2 mol-1. **/cm-1 482w, 502m, 526w, 601w, 658s, 693m, 742m, 799w, 893w, 967m, 1016w, 1099s, 1159s, 1303w, 1397m, 1436m, 1481s, 1636s, 1707s, 2878w, 2967w, 3060w (KBr). **P(CD2Cl2) 48.63 (d, 2*J*(PP) = 14.7, Ph2P), 54.24 (d, 2*J*(PP) = 14.7, Ph2P=N); **F(CD2Cl2) -145.32, -144.28, -141.67 and -136.12 (m, 1 F each, C6F4); **H(CD2Cl2) 0.98 (d, 3 H, 3*J*(HH) = 7.1, CH(C*H*3)2), 1.20 (d, 3 H, 3*J*(HH) = 6.8, CH(C*H*3)2), 1.39 (s, 3 H, CH3), 2.63 (m, 1 H, C*H*(CH3)2), 3.93 (m, 2 H, PCH2P), 4.78 and 5.44 (d, 1 H each, 3*J*(HH) = 6.2, CH of *p*-cymene), 4.87 and 5.31 (d, 1 H each, 3*J*(HH) = 4.0, CH of *p*-cymene), 6.97-7.04 (m, 2 H, Ph), 7.36-7.76 (m, 18 H, Ph), 10.21 (s, 1 H, CHO); **C(CD2Cl2) 17.15 (s, CH3), 20.88 and 21.79 (s, CH(*C*H3)2), 30.63 (dd, 1*J*(CP) = 80.0 and 20.7, PCH2P), 31.06 (s, *C*H(CH3)2), 77.94, 84.11 and 92.27 (s, CH of *p*-cymene), 90.15 (d, 2*J*(CP) = 9.5, CH of *p*-cymene), 100.36 (s, C of *p*-cymene), 112.98 (t, 2*J*(CF) = 9.5, *C*CHO), 119.89 (d, 2*J*(CP) = 4.3, C of *p*-cymene), 125.11-150.12 (m, Ph and C6F4), 182.63 (s, CHO).

**Synthesis of [RuCl(*η*6-*p*-cymene)(*κ*2-*P,N*-Ph2PCH2P{=N-3,4-C6F3(CN)2}Ph2)][SbF6] 1d.** A suspension of complex [RuCl2(*η*6-*p*-cymene)(*κ*1-*P*-Ph2PCH2P{=N-3,4-C6F3(CN)2}Ph2)] (0.443 g, 0.5 mmol) and AgSbF6 (0.172 g, 0.5 mmol) in dichloromethane (40 cm3) was stirred in the dark, at room temperature, for 3 h. The reaction mixture was then filtered through Kieselguhr and the filtrate concentrated to dryness. The resulting orange solid was washed with diethyl ether (3 x 20 cm3) and dried in vacuo. Yield: 0.456 g, 84% (Found: C, 47.40; H, 3.27; N, 3.99. RuC43H36F9N3P2ClSb requires C, 47.56; H, 3.34; N, 3.87%). Conductivity (acetone, 20°C) 111 W-1 cm2 mol-1. **/cm-1 505w, 528w, 660s, 694m, 744m, 798w, 877w, 953w, 984w, 1113m, 1159m, 1210w, 1310w, 1396m, 1437s, 1464s, 1476s, 1521w, 1604w, 2241m, 2923w, 2967w, 3060w (KBr). **P(CD2Cl2) 48.25 (d, 2*J*(PP) = 15.5, Ph2P), 56.04 (d, 2*J*(PP) = 15.5, Ph2P=N); **F(CD2Cl2) -126.20 (dd, 1 F, 4*J*(FF) = 21.1, 3*J*(FF) = 15.6, F atom in *ortho* position adjacent to F), -123.23 (d, 1 F, 3*J*(FF) = 15.6, F atom in *meta* position), -115.62 (d, 1 F, 4*J*(FF) = 21.1, F atom in *ortho* position adjacent to CN); **H(CD2Cl2) 0.98 (d, 3 H, 3*J*(HH) = 7.0, CH(C*H*3)2), 1.14 (d, 3 H, 3*J*(HH) = 7.3, CH(C*H*3)2), 1.36 (s, 3 H, CH3), 2.62 (m, 1 H, C*H*(CH3)2), 3.87 (m, 2 H, PCH2P), 4.91 and 5.47 (br, 2 H each, CH of *p*-cymene), 7.01-7.10 (m, 6 H, Ph), 7.39-7.73 (m, 14 H, Ph); **C(CD2Cl2) 17.11 (s, CH3), 20.80 and 21.90 (s, CH(*C*H3)2), 31.10 (dd, 1*J*(CP) = 78.5 and 21.4, PCH2P), 31.25 (s, *C*H(CH3)2), 77.88 (d, 2*J*(CP) = 5.4, CH of *p*-cymene), 84.08 (d, 2*J*(CP) = 8.7, CH of *p*-cymene), 89.70 (d, 3*J*(CF) = 10.9, CN), 90.19 (d, 2*J*(CP) = 9.7, CH of *p*-cymene), 91.60 (d, 2*J*(CP) = 5.2, CH of *p*-cymene), 100.59 (d, 2*J*(CP) = 4.8, C of *p*-cymene), 101.95 (d, 3*J*(CF) = 18.6, CN), 109.54 and 109.81 (br, *C*CN), 120.45 (d, 2*J*(CP) = 5.2, C of *p*-cymene), 126.24-161.56 (m, Ph and C6F3).

**Synthesis of complex 2a.** A solution of [RuCl(*η*6-*p*-cymene){*κ*2-*P,N*-Ph2PCH2P(=N-4-C5F4N)Ph2}][SbF6] **1a** (0.211 g, 0.2 mmol) and 1,1-diphenyl-2-propyn-1-ol (0.416 g, 2 mmol) in dichloromethane (20 cm3) was stirred at room temperature for 48 h. The solution was then concentrated (*ca.* 2 cm3) and diethyl ether (50 cm3) was added yielding an orange solid which was washed with diethyl ether (3 x 10 cm3) and vacuum-dried. Yield: 0.184 g, 83% (Found: C, 48.57; H, 2.99; N, 2.35. RuC45H32F10N2P2ClSb requires C, 48.65; H, 2.90; N, 2.52%). Conductivity (acetone, 20°C) 106 W-1 cm2 mol-1. **/cm-1 509w, 558m, 596w, 690m, 740m, 779m, 838w, 900w, 962w, 1110m, 1146m, 1271w, 1438s, 1467s, 1642m, 2902w, 2958w, 3060w (KBr). **P(CD2Cl2) 34.56 (d, 2*J*(PP) = 17.1, Ph2P-C), 49.78 (d, 2*J*(PP) = 17.1, Ph2P-N); **F(CD2Cl2) -141.65, -139.83, -90.50 and -90.10 (m, 1 F each, C5F4N); **H(CD2Cl2) 3.10 and 4.43 (m, 1 H each, PCH2P), 5.39 (d, 1 H, 3*J*(HH) = 5.4, CH of coordinated C6H5), 5.64 (dd, 1 H, 3*J*(HH) = 5.7 and 6.0, CH of coordinated C6H5), 6.02 (dd, 1 H, 3*J*(HH) = 6.2 and 5.4, CH of coordinated C6H5), 6.42 (dd, 1 H, 3*J*(HH) = 6.2 and 6.0, CH of coordinated C6H5), 6.54 (d, 1 H, 3*J*(HH) = 5.7, CH of coordinated C6H5), 6.74-6.81 (m, 3 H, Ph), 7.13-7.81 (m, 22 H, Ph); **C(CD2Cl2) 16.21 (dd, 1*J*(CP) = 39.3 and 22.7, PCH2P), 87.58, 93.56 and 97.81 (s, CH of coordinated C6H5), 96.24 (d, 2*J*(CP) = 13.6, CH of coordinated C6H5), 113.85 (d, 2*J*(CP) = 2.3, CH of coordinated C6H5), 123.48-147.89 (m, Ph, C5F4N, C of coordinated C6H5 and =C), 159.22 (s, =C), 234.01 (dd, 2*J*(CP) = 18.1 and 4.5, Ru-C).

**Synthesis of complex 2b.** A solution of [RuCl(*η*6-*p*-cymene){*κ*2-*P,N*-Ph2PCH2P(=N-4-C6F4CN)Ph2}][SbF6] **1b** (0.216 g, 0.2 mmol) and 1,1-diphenyl-2-propyn-1-ol (0.416 g, 2 mmol) in dichloromethane (20 cm3) was stirred at room temperature for 48 h. The solution was then concentrated (*ca.* 2 cm3) and diethyl ether (50 cm3) was added yielding an orange solid which was washed with diethyl ether (3 x 10 cm3) and vacuum-dried. Yield: 0.177 g, 78% (Found: C, 49.83; H, 2.77; N, 2.55. RuC47H32F10N2P2ClSb requires C, 49.74; H, 2.84; N, 2.47%). Conductivity (acetone, 20°C) 115 W-1 cm2 mol-1. **/cm-1 507w, 550w, 617w, 660s, 693m, 742m, 771w, 900w, 987w, 1099m, 1115m, 1261w, 1316w, 1438s, 1490s, 1636w, 2237m, 2852w, 2923w, 3061w (KBr). **P(CD2Cl2) 34.60 (d, 2*J*(PP) = 17.1, Ph2P-C), 49.49 (d, 2*J*(PP) = 17.1, Ph2P-N); **F(CD2Cl2) -137.17, -135.40, -132.69 and -131.97 (m, 1 F each, C6F4); **H(CD2Cl2) 3.11 and 4.45 (m, 1 H each, PCH2P), 5.43 (d, 1 H, 3*J*(HH) = 5.4, CH of coordinated C6H5), 5.64 (dd, 1 H, 3*J*(HH) = 6.3 and 6.0, CH of coordinated C6H5), 6.05 (dd, 1 H, 3*J*(HH) = 6.0 and 5.4, CH of coordinated C6H5), 6.41 (dd, 1 H, 3*J*(HH) = 6.3 and 6.0, CH of coordinated C6H5), 6.52 (d, 1 H, 3*J*(HH) = 6.0, CH of coordinated C6H5), 6.76-6.82 (m, 3 H, Ph), 7.11-7.78 (m, 22 H, Ph); **C(CD2Cl2) 16.32 (dd, 1*J*(CP) = 38.9 and 21.5, PCH2P), 87.60, 93.63 and 97.66 (s, CH of coordinated C6H5), 94.91 (t, 3*J*(CF) = 17.4, CN), 96.28 (d, 2*J*(CP) = 13.3, CH of coordinated C6H5), 107.65 (br, *C*CN), 113.92 (d, 2*J*(CP) = 1.4, CH of coordinated C6H5), 123.46-149.54 (m, Ph, C6F4, C of coordinated C6H5 and =C), 159.42 (s, =C), 234.61 (dd, 2*J*(CP) = 14.3 and 2.5, Ru-C).

**Synthesis of complex 2c.** A solution of [RuCl(*η*6-*p*-cymene){*κ*2-*P,N*-Ph2PCH2P(=N-4-C6F4CHO)Ph2}][SbF6] **1c** (0.216 g, 0.2 mmol) and 1,1-diphenyl-2-propyn-1-ol (0.416 g, 2 mmol) in dichloromethane (20 cm3) was stirred at room temperature for 48 h. The solution was then concentrated (*ca.* 2 cm3) and diethyl ether (50 cm3) was added yielding an orange solid which was washed with diethyl ether (3 x 10 cm3) and vacuum-dried. Yield: 0.200 g, 88% (Found: C, 49.49; H, 2.85; N, 1.30. RuC47H33F10P2ClNOSb requires C, 49.60; H, 2.92; N, 1.23%). Conductivity (acetone, 20°C) 110 W-1 cm2 mol-1. **/cm-1 505w, 540w, 568w, 658s, 692s, 741m, 775w, 897w, 999w, 1097m, 1120m, 1307w, 1397w, 1438s, 1479s, 1640w, 1709m, 2920w, 2960w, 3059w (KBr). **P(CD2Cl2) 33.90 (d, 2*J*(PP) = 16.2, Ph2P-C), 49.54 (d, 2*J*(PP) = 16.2, Ph2P-N); **F(CD2Cl2) -145.47, -145.00, -139.86 and -138.02 (m, 1 F each, C6F4); **H(CD2Cl2) 3.12 and 4.46 (m, 1 H each, PCH2P), 5.42 (d, 1 H, 3*J*(HH) = 5.7, CH of coordinated C6H5), 5.65 (dd, 1 H, 3*J*(HH) = 6.0 and 5.7, CH of coordinated C6H5), 6.01 (dd, 1 H, 3*J*(HH) = 6.2 and 5.7, CH of coordinated C6H5), 6.40 (dd, 1 H, 3*J*(HH) = 6.2 and 6.0, CH of coordinated C6H5), 6.53 (d, 1 H, 3*J*(HH) = 5.7, CH of coordinated C6H5), 6.77-6.88 (m, 3 H, Ph), 7.13-7.80 (m, 22 H, Ph), 10.29 (s, 1H, CHO); **C(CD2Cl2) 16.39 (dd, 1*J*(CP) = 38.6 and 21.2, PCH2P), 87.50, 93.48, 97.65 and 113.85 (s, CH of coordinated C6H5), 96.23 (d, 2*J*(CP) = 13.5, CH of coordinated C6H5), 115.78 (t, 2*J*(CF) = 8.7, *C*CHO), 123.61-149.06 (m, Ph, C6F4, C of coordinated C6H5 and =C), 158.93 (s, =C), 182.77 (s, CHO), 234.82 (dd, 2*J*(CP) = 17.4 and 3.9, Ru-C).

**Synthesis of complex 2d.** A solution of [RuCl(*η*6-*p*-cymene)(*κ*2-*P,N*-Ph2PCH2P{=N-3,4-C6F3(CN)2}Ph2)][SbF6] **1d** (0.217 g, 0.2 mmol) and 1,1-diphenyl-2-propyn-1-ol (0.416 g, 2 mmol) in dichloromethane (20 cm3) was stirred at room temperature for 48 h. The solution was then concentrated (*ca.* 2 cm3) and diethyl ether (50 cm3) was added yielding an orange solid which was washed with diethyl ether (3 x 10 cm3) and vacuum-dried. Yield: 0.194 g, 85% (Found: C, 50.21; H, 2.77; N, 3.80. RuC48H32F9N3P2ClSb requires C, 50.48; H, 2.82; N, 3.68%). Conductivity (acetone, 20°C) 111 W-1 cm2 mol-1. **/cm-1 505w, 521w, 576w, 659s, 691m, 743m, 770m, 817w, 900w, 954w, 1000w, 1028w, 1112m, 1145w, 1279w, 1328w, 1438s, 1474s, 1623w, 2241m, 2927w, 2962w, 3059w (KBr). **P(CD2Cl2) 35.65 (d, 2*J*(PP) = 15.8, Ph2P-C), 49.45 (d, 2*J*(PP) = 15.8, Ph2P-N); **F(CD2Cl2) -127.98 (dd, 1 F, 4*J*(FF) = 22.4, 3*J*(FF) = 13.1, F atom in *ortho* position adjacent to F), -118.10 (d, 1 F, 3*J*(FF) = 13.1, F atom in *meta* position), -104.23 (d, 1 F, 4*J*(FF) = 22.4, F atom in *ortho* position adjacent to CN); **H(CD2Cl2) 3.10 and 4.44 (m, 1 H each, PCH2P), 5.42 (d, 1 H, 3*J*(HH) = 4.8, CH of coordinated C6H5), 5.63 (dd, 1 H, 3*J*(HH) = 6.3 and 5.9, CH of coordinated C6H5), 6.02 (dd, 1 H, 3*J*(HH) = 6.0 and 4.8, CH of coordinated C6H5), 6.44 (dd, 1 H, 3*J*(HH) = 6.0 and 5.9, CH of coordinated C6H5), 6.56 (d, 1 H, 3*J*(HH) = 6.3, CH of coordinated C6H5), 6.69-6.76 (m, 3 H, Ph), 7.17-7.80 (m, 22 H, Ph); **C(CD2Cl2) 16.36 (dd, 1*J*(CP) = 37.6 and 20.3, PCH2P), 87.54, 93.73, 97.64 and 114.07 (s, CH of coordinated C6H5), 89.50 (d, 3*J*(CF) = 12.9, CN), 96.50 (d, 2*J*(CP) = 14.1, CH of coordinated C6H5), 100.77 (d, 3*J*(CF) = 21.9, CN), 109.40 and 109.56 (br, *C*CN), 123.28-147.90 (m, Ph, C5F3, C of coordinated C6H5 and =C), 160.06 (s, =C), 234.36 (dd, 2*J*(CP) = 16.5 and 1.7, Ru-C).

**Synthesis of [RuCl(=C=C=CPh2)(*η*6-1,3,5-C3H3Me3){*κ*1-*P*-Ph2PCH2P(=N-4-C5F4N)Ph2}][SbF6] 5.** A solution of [RuCl(*η*6-1,3,5-C6H3Me3){*κ*2-*P,N*-Ph2PCH2P(=N-4-C5F4N)Ph2}][SbF6] **3** (0.208 g, 0.2 mmol) and 1,1-diphenyl-2-propyn-1-ol (0.416 g, 2 mmol) in dichloromethane (20 cm3) was stirred at room temperature for 12 h. The solution was then concentrated (*ca.* 2 cm3) and diethyl ether (50 cm3) was added yielding a violet solid which was washed with diethyl ether (3 x 10 cm3) and vacuum-dried. Yield: 0.194 g, 79% (Found: C, 52.57; H, 3.71; N, 2.33. RuC54H44F10N2P2ClSb requires C, 52.68; H, 3.60; N, 2.28%). Conductivity (acetone, 20°C) 112 W-1 cm2 mol-1. **/cm-1 497w, 541w, 659s, 694m, 738w, 787w, 956m, 1031w, 1096m, 1128m, 1179s, 1309w, 1439w, 1474s, 1517s, 1586m, 1637m, 1964vs, 2898w, 2958w, 3056w (KBr). **P(CD2Cl2) 9.08 (d, 2*J*(PP) = 31.7, Ph2P=N), 38.89 (d, 2*J*(PP) = 31.7, Ph2P); **F(CD2Cl2) -156.58 and -97.78 (m, 2 F each, C5F4N); **H(CD2Cl2) 1.87 (s, 9 H, CH3), 3.55 and 5.04 (m, 1 H each, PCH2P), 5.38 (s, 3 H, C6*H*3Me3), 6.90 (m, 4 H, Ph), 7.26-7.53 (m, 16 H, Ph), 7.64-7.79 (m, 4 H, Ph), 8.02 (m, 6 H, Ph); **C(CD2Cl2) 19.59 (s, CH3), 28.76 (dd, 1*J*(CP) = 57.8 and 25.6, PCH2P), 100.30 (s, CH of C6H3Me3), 121.06 (s, C of C6H3Me3), 127.06-146.36 (m, Ph and C5F4N), 174.46 (s, C*γ*), 179.24 (s, C*β*), 283.28 (d, 2*J*(CP) = 24.6, Ru=C*α*).

**Synthesis of [RuCl(=C=C=CPh2)(*η*6-C6Me6){*κ*1-*P*-Ph2PCH2P(=N-4-C5F4N)Ph2}][SbF6] 6.** A solution of [RuCl(*η*6-C6Me6){*κ*2-*P,N*-Ph2PCH2P(=N-4-C5F4N)Ph2}][SbF6] **4** (0.217 g, 0.2 mmol) and 1,1-diphenyl-2-propyn-1-ol (0.416 g, 2 mmol) in dichloromethane (20 cm3) was stirred at room temperature for 5 h. The solution was then concentrated (*ca.* 2 cm3) and diethyl ether (50 cm3) was added yielding a violet solid which was washed with diethyl ether (3 x 10 cm3) and vacuum-dried. Yield: 0.209 g, 82% (Found: C, 53.90; H, 3.88; N, 2.17. RuC57H50F10N2P2ClSb requires C, 53.77; H, 3.96; N, 2.20%). Conductivity (acetone, 20°C) 115 W-1 cm2 mol-1. **/cm-1 496w, 539w, 594w, 658s, 694m, 741w, 789w, 956m, 999w, 1096s, 1180s, 1262w, 1309w, 1384w, 1439m, 1474s, 1519s, 1587m, 1639m, 1961vs, 2900w, 2970w, 3058w (KBr). **P(CD2Cl2) 7.25 (d, 2*J*(PP) = 31.6, Ph2P=N), 40.30 (d, 2*J*(PP) = 31.6, Ph2P); **F(CD2Cl2) -156.78 and -97.36 (m, 2 F each, C5F4N); **H(CD2Cl2) 1.77 (s, 18 H, CH3), 3.54 and 5.12 (m, 1 H each, PCH2P), 6.87 (m, 4 H, Ph), 7.27-7.57 (m, 16 H, Ph), 7.76-7.83 (m, 4 H, Ph), 8.07 (m, 6 H, Ph); **C(CD2Cl2) 15.90 (s, CH3), 30.84 (dd, 1*J*(CP) = 50.9 and 25.1, PCH2P), 113.92 (d, 2*J*(CP) = 1.4, *C*6Me6), 127.30-145.75 (m, Ph and C5F4N), 170.94 (s, C*γ*), 184.11 (s, C*β*), 283.61 (d, 2*J*(CP) = 25.8, Ru=C*α*).

________________

1 V. Cadierno, P. Crochet, J. García-Álvarez, S. E. García-Garrido and J. Gimeno, *J. Organomet. Chem.*, 2002, **663**, 32.

2 V. Cadierno, J. Díez, S. E. García-Garrido, S. García-Granda and J. Gimeno, *J. Chem. Soc., Dalton Trans.*, 2002, 1465.

3 K. V. Katti, B. D. Santarsiero, A. A. Pinkerton and R. G. Cavell, *Inorg. Chem.*, 1993, **32**, 5919.

4 J. F. W. Keana and S. X. Cai, *J. Org. Chem.*, 1990, **55**, 3640.
